# Supplementary material
Source: publisher figshare collection journal article supplement (https://tandf.figshare.com/ndownloader/files/13193552)
Supplement: Supplementary file 1 [file 13193552]

Supplementary Table 1. Primers and clones used in this study.

| Primer name | Sequence | purpose | other information |
| --- | --- | --- | --- |
| Cas9-F | CACCATGGACTATAAGGACCACG | Directional cloning of Cas9 | Cloning in entry clone pENTER-D-TOPO |
| Cas9-R | TTACTTTTTCTTTTTTGCCTGGC |
| TYLCV 2.3-CP-T1/2-F | TCTGTTCACGGATTTCGTTG | CP target sequence flaking fragment amplification | Used for Sanger sequencing |
| TYLCV2.3-CP-T1/2-R | TTCTTCACGGTTGCGGTACT | CP target sequence flaking fragment amplification | Used for Sanger sequencing |
| TYLCV2.3-REP-T1/2-F | GAGCTTTGGACCCTGAATTG | Rep target sequence flaking fragment amplification | Used for Sanger sequencing |
| TYLCV2.3-REP-T1/2-R | TTGGAGCGTGATGATTTTGA | Rep target sequence flaking fragment amplification | Used for Sanger sequencing |
| TYLCV2.3-IR-T-F | AATTGGGAAAGTGCTTCCTCT | IR target sequence flaking fragment amplification | Used for Sanger sequencing |
| TYLCV2.3-IR-T-R | ATAGTCACGGGCCCTTACAACA | IR target sequence flaking fragment amplification | Used for Sanger sequencing |
| Clones used | | | |
| pENDTER-D-Cas9 | Available on request |  | Entry clone for Cas9 |
| U6-cp-sgRNA-pK2-Cas9 | Available on request | Making permanent *N. benthamiana* and tomato lines | T-DNA binary vector |
| U6-rep-sgRNA-pK2-Cas9 | Available on request | Making permanent *N. benthamiana* and tomato lines | T-DNA binary vector |
| U6-ir-sgRNA-pK2-Cas9 | Available on request | Making permanent *N. benthamiana* and tomato lines | T-DNA binary vector |
| pG-TYLCV2.3 | Available on request | Infectious clone of TYLCV | T-DNA infectious clone |
| pJet2.1 |  | Amplicon cloning for sanger sequencing |  |
